# Supplementary material for: Uranium Determination in Waters, Wine and Honey by Solid Phase Extraction with New Ion Imprinted Polymer
Source: MDPI journal article supplement (doi:10.3390/molecules27175516), 2022-08-27
Supplement: s1 [file s1]

Supplementary Materials

# Uranium Determination in Waters, Wine and Honey by Solid Phase Extraction with New Ion Imprinted Polymer

Valentin Georgiev, Ivanka Dakova \* and Irina Karadjova

Faculty of Chemistry and Pharmacy, University of Sofia “St. Kliment Ohridski”, 1, J. Bourchier Blvd., 1164 Sofia, Bulgaria

\* Correspondence: i.dakova@chem.uni-sofia.bg

## Figures

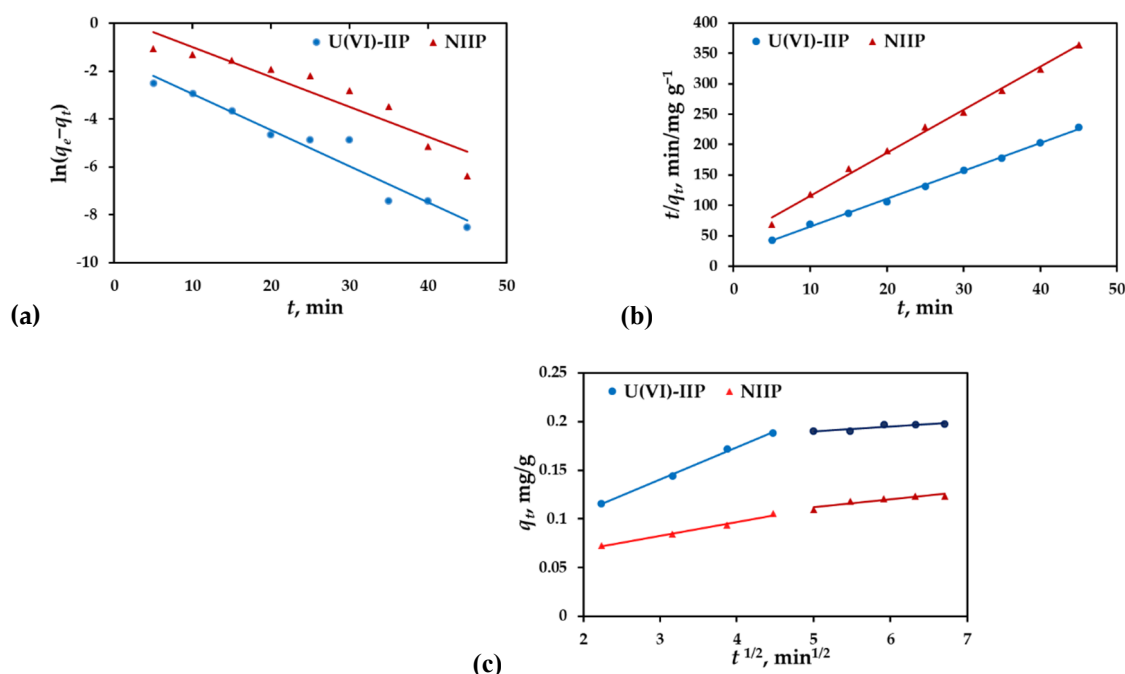

**Figure S1.** Kinetic analysis of U(VI) adsorption on U(VI)-IIP and NIIP: the linear fitting curves of pseudo-first-order reaction (a) and pseudo-second-order reaction (b) and intra-particle diffusion model (c). (pH 7; sorbent dose = 100 mg/10 mL;  $C_0$  = 2 mg U(VI)/L, temperature 298 K).

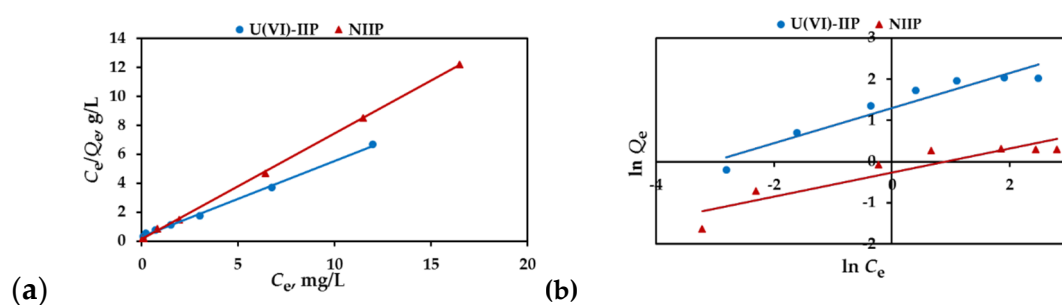

**Figure S2.** Langmuir (a) and Freundlich (b) isotherms for adsorption of U(VI) on the U(VI)-IIP and NIIP.

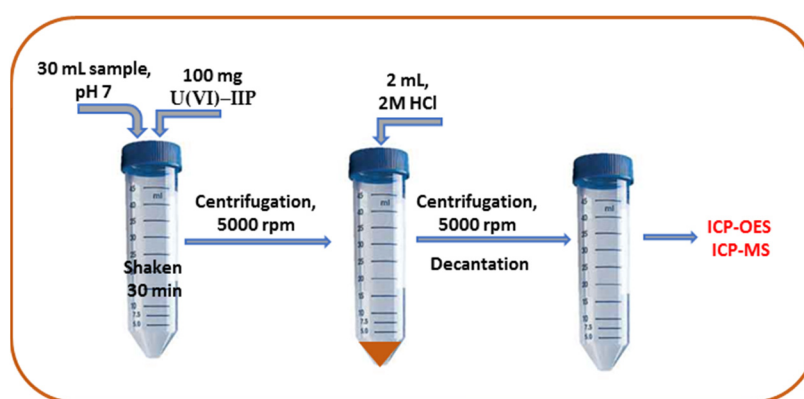

**Figure S3.** Scheme of analytical procedure for U determination in surface waters using U(VI)-IIP.

## Tables

**Table S1.** Polymerization conditions for the preparation of copolymer gels (70 mg AIBN; 25 mL ACN; TMPTMA (0.96 mmol); U(VI)-PAR (0.12 mmol); T = 60 °C; 24 h) and nitrogen content, surface area ( $S_{\text{BET}}$ ), total pore volume ( $V_{\text{total}}$ ), average pore diameter ( $D_{\text{average}}$ ) and adsorption capacities of U(VI)-IIPs.

| Copolymer gel | MAA (mmol) | N content (% wt.) | $S_{\text{BET}}$ (m <sup>2</sup> /g) | $V_{\text{total}}$ (cm <sup>3</sup> /g) | $D_{\text{average}}$ (nm) | Capacity (mg/g) |
|---------------|------------|-------------------|--------------------------------------|-----------------------------------------|---------------------------|-----------------|
| U(VI)-PAR-1   | 0.58       | 2.25              | 7.0                                  | 0.04                                    | 24                        | 0.96            |
| U(VI)-PAR-2   | 1.16       | 2.63              | 6.2                                  | 0.06                                    | 20                        | 1.29            |
| U(VI)-PAR-3   | 1.80       | 2.85              | 6.4                                  | 0.02                                    | 20                        | 1.55            |
| U(VI)-PAR-4   | 2.16       | 3.10              | 6.5                                  | 0.05                                    | 22                        | 1.89            |
| U(VI)-PAR-5   | 2.50       | 2.96              | 6.5                                  | 0.04                                    | 24                        | 1.80            |

**Table S2.** Degree of elution ( $D_{\text{E}}$ , %) for U(VI) from U(VI)-IIP using different eluents (10 mL).

| Desorption agent | Concentration | $D_{\text{E}}$ , % |
|------------------|---------------|--------------------|
| HCl              | 0.5 mol/L     | 48±4               |
|                  | 1 mol/L       | 83±3               |
|                  | 2 mol/L       | 96±2               |
|                  | 3 mol/L       | 99±2               |

**Table S3.** Parallel analysis of tap water by the proposed analytical method and direct Alfa spectrometry.

| U content, Bq/L  | Tap water 1                 |                    | Tap water 2                |                    |
|------------------|-----------------------------|--------------------|----------------------------|--------------------|
|                  | Proposed analytical method* | Alpha spectrometry | Proposed analytical method | Alpha spectrometry |
| <sup>234</sup> U | 0.29±0.02                   | 0.27±0.03          | 0.48±0.03                  | 0.50±0.04          |
| <sup>238</sup> U | 0.28±0.03                   | 0.27±0.02          | 0.47±0.04                  | 0.46±0.03          |

\*—in this case ICP-MS was used as instrumental method.

**Table S4.** Comparative analysis by the proposed method and standard method based on microwave digestion of wine/honey sample and ICP-MS measurement.

| Sample              | U content                        |                              |
|---------------------|----------------------------------|------------------------------|
|                     | Proposed analytical method, µg/L | ICP-MS after digestion, µg/L |
| Red wine (Cabernet) | 0.74±0.04                        | 0.77±0.02                    |
| White wine (Muskat) | 0.43±0.03                        | 0.41±0.02                    |
| Honey (sunflower)   | 1.43±0.12                        | 1.51±0.08                    |
| Honey (lime)        | 3.52±0.21                        | 3.58±0.09                    |

**Table S5.** Comparison of different U(VI) ion imprinted polymer sorbents.

| Chelating agent/Matrix                                                                                                        | Capacity,<br>mg/g | Instrumental<br>method | LOQ,<br>µg/L  | Ref.      |
|-------------------------------------------------------------------------------------------------------------------------------|-------------------|------------------------|---------------|-----------|
| 2,4-dioxopentan-3-yl methacrylate – ethylene glycol dimethacrylate                                                            | 15.3              | ICP-OES                |               | [29]      |
| oleic acid coated magnetic particles                                                                                          | 1.06              | ICP-OES                |               | [50]      |
| 1-hydroxy-2-(prop-2'-enyl)-9,10-anthraquinone – ethylene glycol dimethacrylate                                                | 12.4              | UV-VIS                 |               | [27]      |
| Salicylaldoxime / magnetic IIP                                                                                                | 1.2               | ICP-OES                | -             | [49]      |
| Salicylaldoxime / γ-methacryloxypropyltrimethoxysilane modified magnetic nanoparticles – MAA – ethylene glycol dimethacrylate | 5.4               | ICP-OES                |               | [38]      |
| Salicylaldoxime / 4-vinylpyridine – MAA – ethylene glycol dimethacrylate                                                      | 15.3              | UV-VIS                 | 5             | [25]      |
| 5,7-dichloroquinoline-8-ol / 4-vinylpyridine – styrene – divinyl benzene                                                      | 34                | UV-VIS                 | 2             | [22]      |
| N-hydroxyethylacrylamide and 1-vinylimidazole@ magnetic microspheres                                                          | 146               | ICP-OES                | 0.8 mg/L      | [39]      |
| IIP-grafted silica                                                                                                            | -                 | ICP-OES                | 0.09<br>(LOD) | [34]      |
| 4-(2-Pyridylazo)resorcinol / MAA – TMPTMA                                                                                     | 1.89              | ICP-OES<br>ICP-MS      | 0.15<br>0.003 | This work |
